# Supplementary figures and images for: Generation and functional characterization of anti-human and anti-mouse IL-36R antagonist monoclonal antibodies
Source: PubMed Central journal article supplement — MAbs. 2017 Jul 20;9(7):1143–54. doi: 10.1080/19420862.2017.1353853 (PMC5627585; doi:10.1080/19420862.2017.1353853), 2017-07-20

# Suppl. Fig. S1

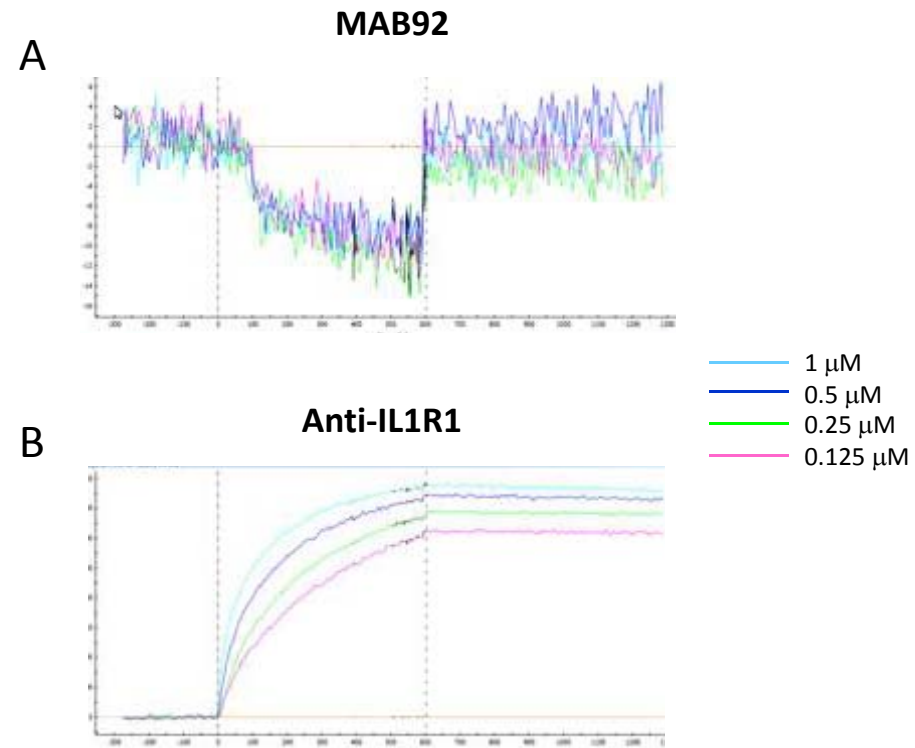

# Suppl. Fig. S2

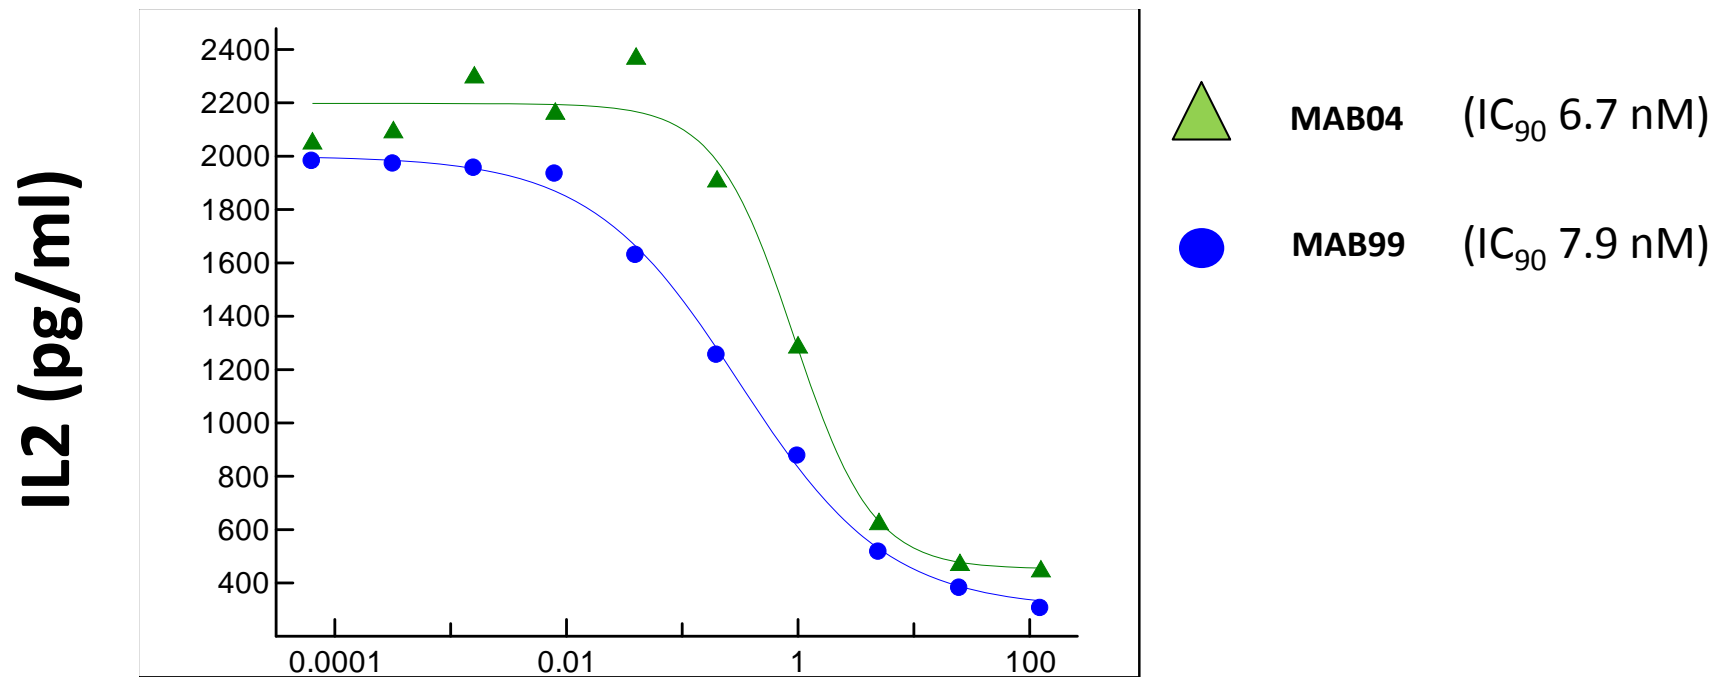

# Suppl. Fig. S3

**A**

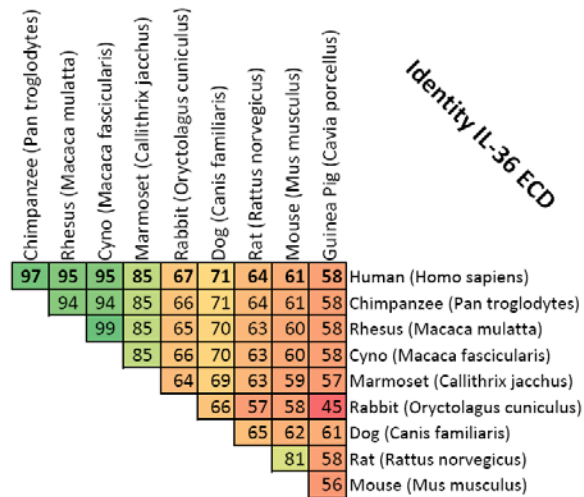

**B**

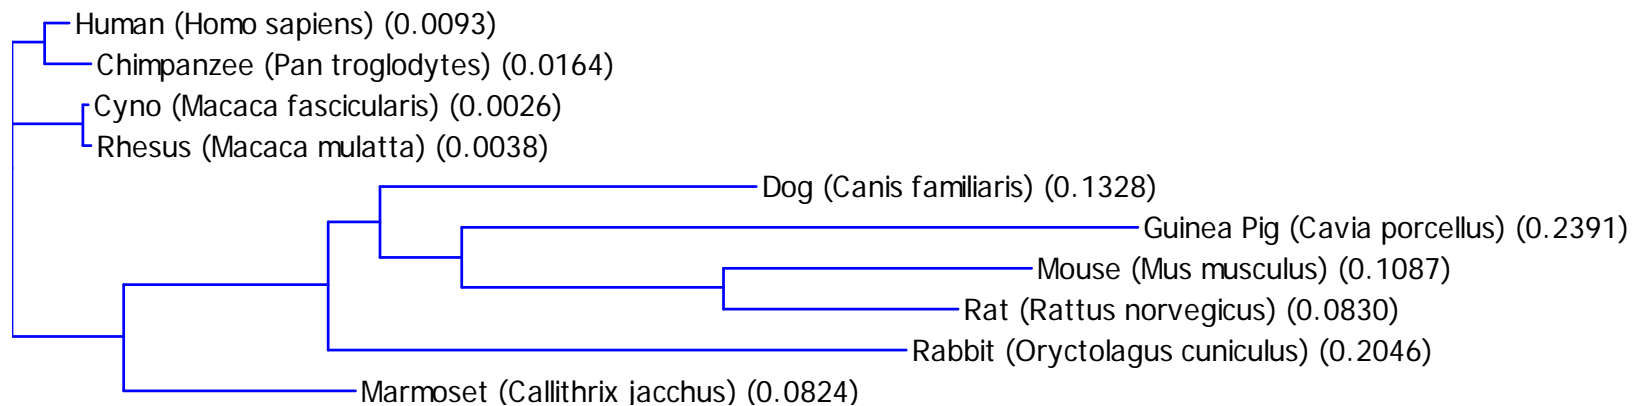

Supplement: kmab-09-07-1353853-s001.pdf [file kmab-09-07-1353853-s001.pdf]
